# Supplementary material
Source: PubMed Central journal article supplement (PMC3186438)
Supplement: supp_M111.276329_jbc.M111.276329-1.pdf [file supp_M111.276329_jbc.M111.276329-1.pdf]

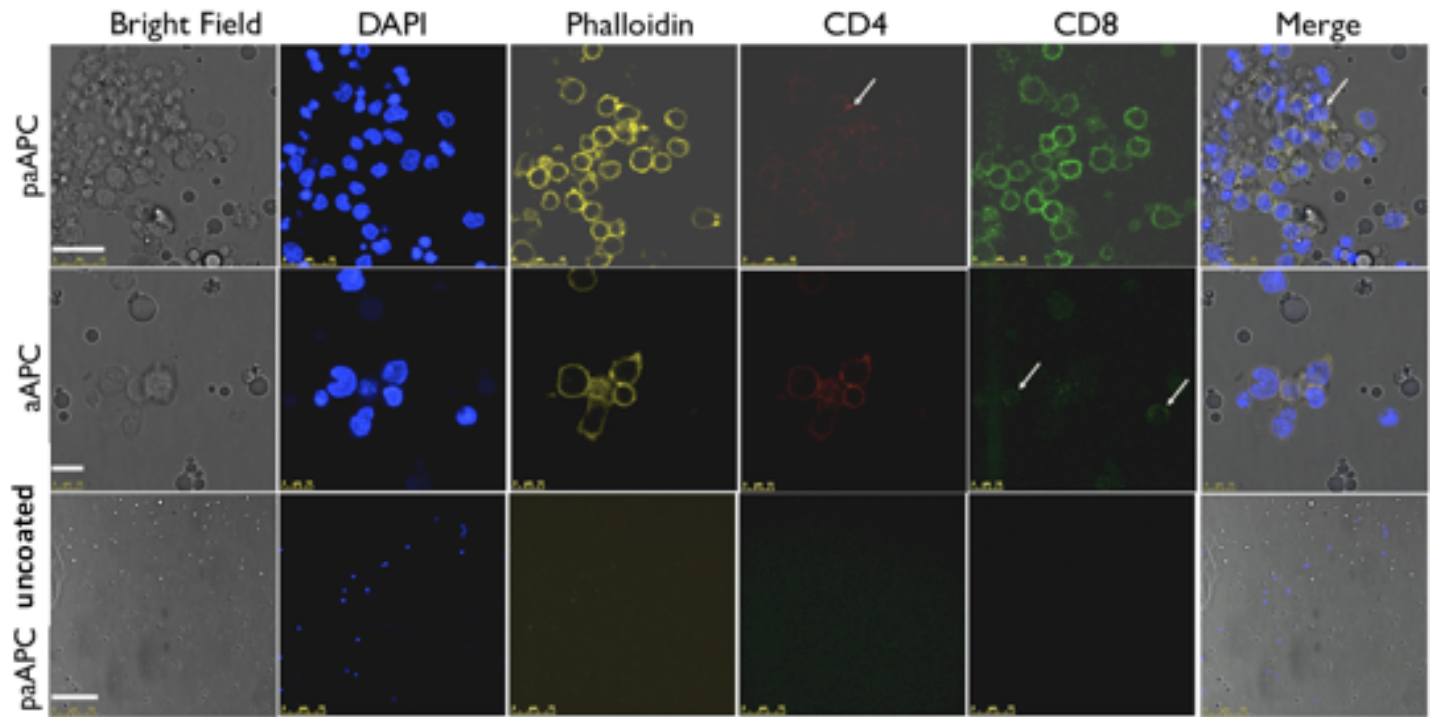

**Figure S1: Confocal microscopy images of CD4 and CD8 T cell populations.** Day 4 incubated with: (Top row) PLGA microparticles encapsulating rhIL-2 and presenting antibody stimulus, (middle row) PLGA microparticles presenting antibody stimulus, and (bottom row) PLGA microparticles encapsulating rhIL-2. White arrow point to either a CD4 or CD8 T cell in a given channel. Scale bars: 25  $\mu\text{m}$  (top row), 10  $\mu\text{m}$  (middle row), 75  $\mu\text{m}$  (bottom row).

Microscopy Method: CD4<sup>+</sup> and CD8<sup>+</sup> T cells were cultured with particles or paAPC at a concentration of 0.5 mg/ml in a Lab-Tek® four-chamber slide system (Nunc, Rochester, NY). Annexin V staining (BD Biosciences, San Jose, CA) was performed before fixation to avoid disturbing the cell membrane. Cells were then washed and fixed with 500  $\mu\text{l}$  of 4% paraformaldehyde, permeabilized in 0.1% Triton X-100 in PBS, and stained at a 1:400 dilution of CD4-PE (BD Biosciences, San Jose, CA) overnight at 4°C. Cells were then stained with phalloidin-FITC (Invitrogen, Carlsbad, CA) and a drop of Vectashield with DAPI (Vector Labs, Burlingame, CA) was placed on a slide before mounting the coverslip. Immunofluorescent imaging was performed using an inverted TCS SP5 confocal microscope (Leica Microsystems, Bannockburn, IL).
