# Supplementary material
Source: PubMed Central journal article supplement (PMC3186438)
Supplement: supp_M111.276329_jbc.M111.276329-2.pdf [file supp_M111.276329_jbc.M111.276329-2.pdf]

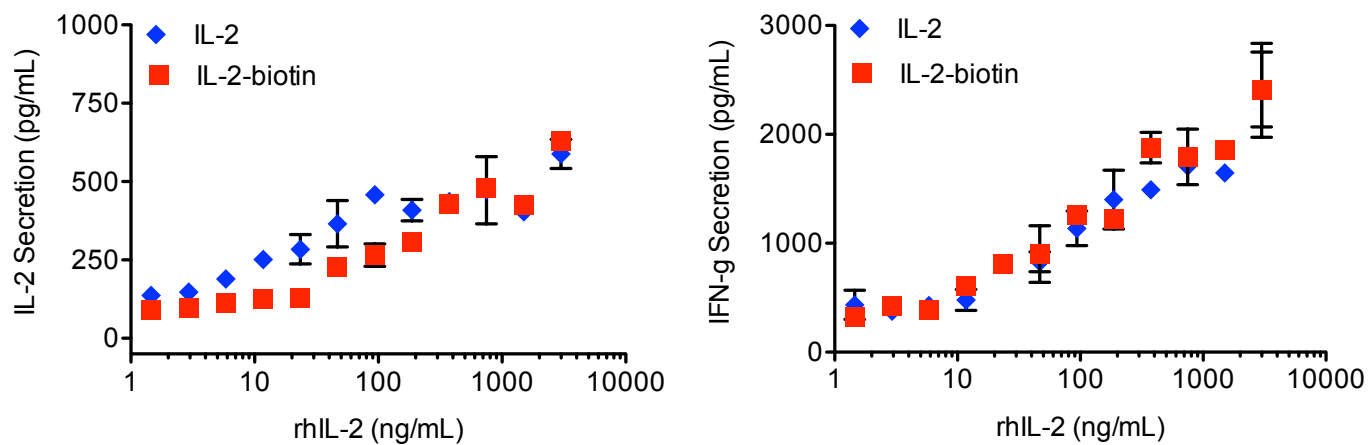

**Figure S2: IL-2-biotin retains bioactivity** Unmodified IL-2 or IL-2-biotin were serially diluted across rows of a 96-well plate prior to addition of splenocytes and soluble anti-CD3 and anti-CD28 (5  $\mu$ g/mL). After 48 hours, cytokine concentrations in the supernatant were measured by ELISA. IL-2 biotin was prepared by reacting IL-2 with biotin-hydrazide (Pierce, Rockford, IL) according to the manufacturer's instructions.
