# Supplementary material
Source: PubMed Central journal article supplement (PMC3186438)
Supplement: supp_M111.276329_jbc.M111.276329-3.pdf [file supp_M111.276329_jbc.M111.276329-3.pdf]

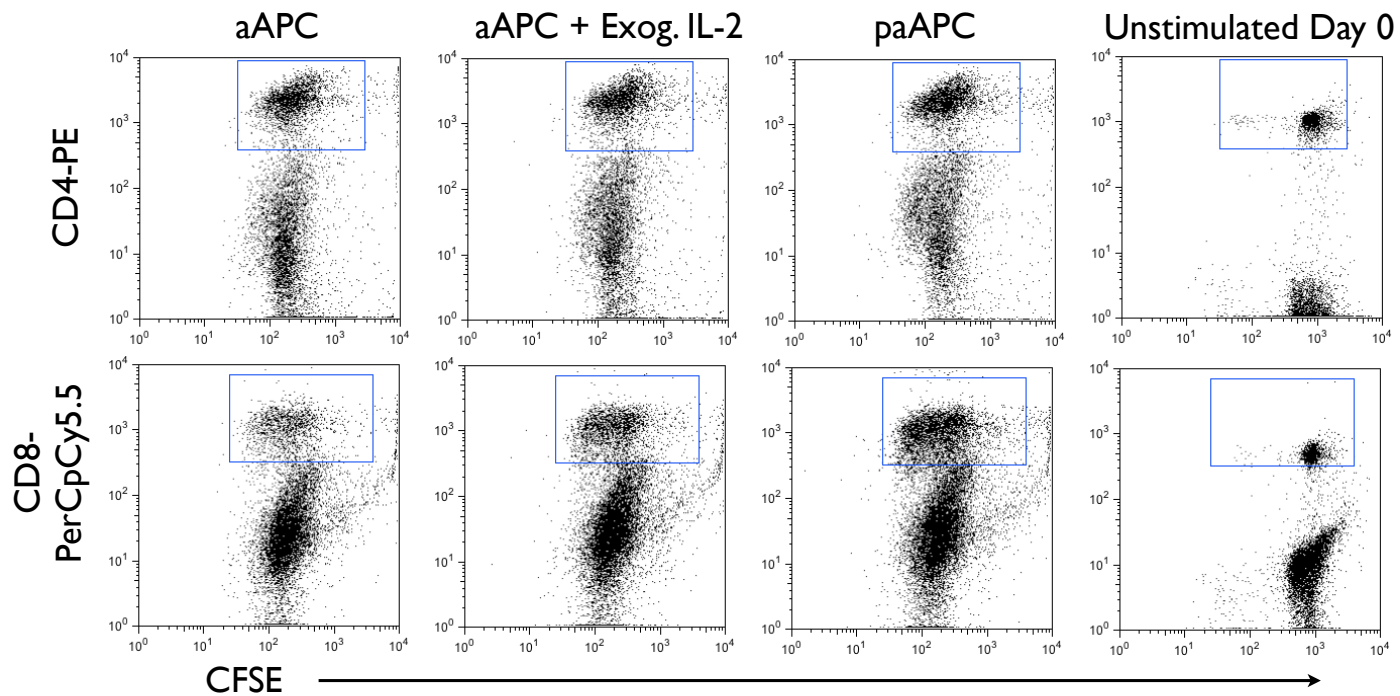

**Figure S3:** Representative CFSE dot plots from Figure 6B gated on lymphocytes and stained for CD4 or CD8 versus CFSE.
