# Supplementary material
Source: PubMed Central journal article supplement (PMC3186438)
Supplement: supp_M111.276329_jbc.M111.276329-4.pdf [file supp_M111.276329_jbc.M111.276329-4.pdf]

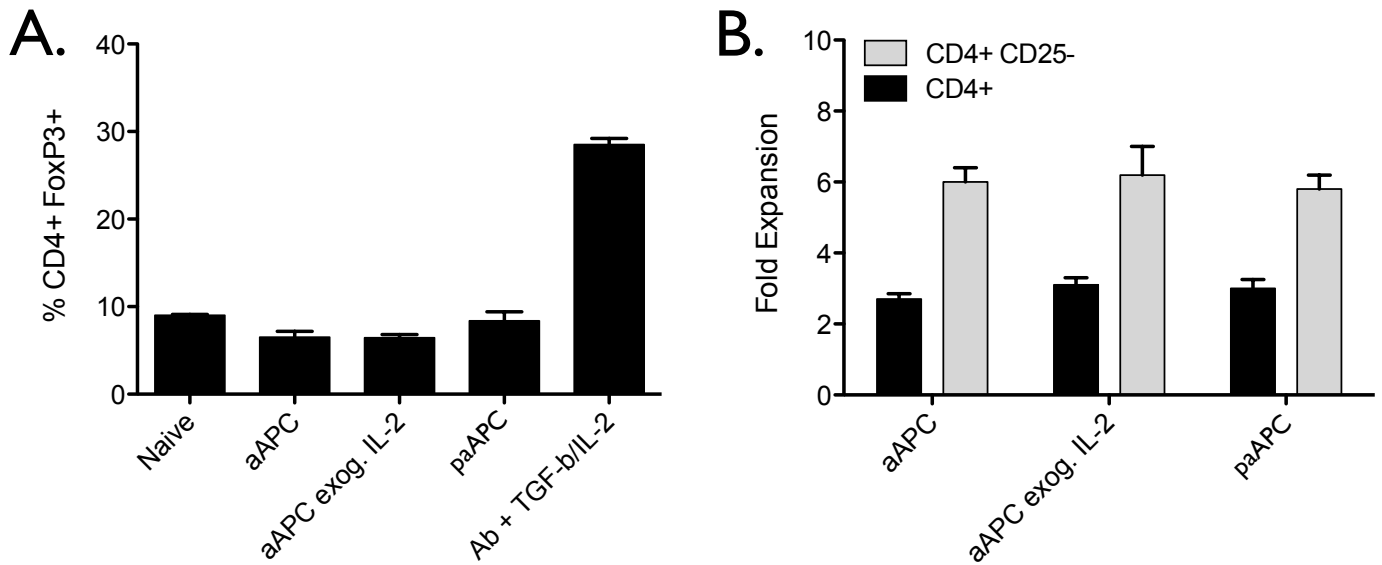

**Figure S4: CD4+ regulatory T cells do not significantly hinder CD4+ T cell proliferation** (A) CD4+ T cells were stimulated with aAPCs for 4 days followed by intracellular staining for foxP3. No expansion of the foxP3+ subset was observed with the exception of the positive control group, which received TGF-beta. (B) Depletion of CD25+ cells (natural regulatory T cells) from the CD4+ population prior to stimulation produced only modest increases in expansion over 96 hours.
